# Supplementary material
Source: publisher site journal article supplement (https://www.spandidos-publications.com/7149/downloadSupplementary)
Supplement: Supplementary file 1 [file downloadSupplementary]

## Sheet: FANCE expression
Table SII. Clinical and pathological features of OSCC samples from TCGA
sampleID	OS.time	OS	alcohol_history_documented	smoking_history_documented	anatomic_neoplasm_subdivision	clinical_M	clinical_N	clinical_T	clinical_stage	lymphovascular_invasion_present	margin_status	neoplasm_histologic_grade	new_tumor_event_after_initial_treatment	pathologic_M	perineural_invasion_present
TCGA-CV-6940	804	1	NO	1	Buccal Mucosa	M0	N0	T1	Stage I		Negative	G2	NO
TCGA-BA-6873	122	0	YES	1	Oral Tongue	M0	N2b	T2	Stage IVA	YES	Close	G2	YES		YES
TCGA-CR-7397	754	0	YES	1	Oral Tongue	M0	N2b	T3	Stage IVA	NO	Negative	G2	NO	M0	NO
TCGA-H7-A6C4	414	0	YES	1	Oral Tongue	M0	N1	T3	Stage III	YES	Negative	G2	YES	M0	YES
TCGA-F7-8489	658	0	NO	1	Floor of mouth	M0	N0	T2	Stage II	NO	Close	G1	NO	M0	NO
TCGA-F7-A61W	14	0	YES	1	Oral Tongue	MX	NX	TX		YES	Negative	G2	NO	M0	NO
TCGA-MT-A51X	242	0	NO	1	Oral Tongue	M0	N2b	T1	Stage IVA	YES	Negative	G1	NO	M0
TCGA-CR-7391	913	0	YES	1	Oral Tongue	M0	N0	T1	Stage I	NO	Negative	G1	NO	M0	NO
TCGA-CX-7219	1045	0	YES	1	Floor of mouth	M0	N2c	T4a	Stage IVA	YES	Close	G2	NO		NO
TCGA-F7-A61S	576	0	YES	1	Oral Tongue	MX	NX	TX			Negative	G1	YES	M0
TCGA-CN-4742	397	1	YES	1	Oral Tongue	M0	N1	T4a	Stage IVA	YES	Negative	G3	NO	M0	YES
TCGA-KU-A6H8	327	1	YES	1	Oral Tongue	M0	N0	T1	Stage I	YES	Negative	G3	YES	M0	YES
TCGA-CV-7180	327	1	YES	1	Oral Tongue	M0	N0	T2	Stage II		Negative	G2
TCGA-CQ-A4CB	893	0	YES	1	Floor of mouth	M0	N0	T2	Stage II	NO	Negative	G2	NO	M0	YES
TCGA-UF-A7JC	546	1	NO	1	Floor of mouth	M0	N1	T3	Stage III	YES	Positive	G1	NO	M0	NO
TCGA-WA-A7GZ	625	1		1	Floor of mouth	M0	N0	T2	Stage II		Negative	G2	NO
TCGA-IQ-A6SH	471	0		1	Oral Tongue	M1	N1	T2	Stage IVC	NO	Negative	G1	NO	M0	NO
TCGA-QK-A6II	284	1	YES	1	Floor of mouth	M0	N0	T3	Stage III	NO	Negative	G2	YES	M0	YES
TCGA-CV-A6JY	646	0	YES	1	Oral Cavity	M0	N0	T4a	Stage IVA		Negative	G1	NO	M0
TCGA-D6-6827	568	0	NO	1	Lip	M0	N1	T1	Stage III		Close	G3	NO
TCGA-IQ-A61E	1147	0	YES	1	Oral Tongue	MX	N0	T3	Stage III	NO	Close	G2	NO	MX	YES
TCGA-H7-8502	458	0	YES	1	Oral Cavity	M0	N2b	T4a	Stage IVA	YES	Positive	G2	NO	M0	YES
TCGA-IQ-A61G	360	0	NO	1	Floor of mouth	MX	N2c	T4a	Stage IVA	NO	Negative	G2	YES	MX	YES
TCGA-CN-A63V	679	0	NO	1	Buccal Mucosa	M0	N0	T4	Stage IVA	NO	Negative	G2	NO	MX	NO
TCGA-BA-5149	806	1	YES	1	Floor of mouth	M0	N2b	T3	Stage IVA	NO	Negative	G2	YES		NO
TCGA-CN-4736	395	1	YES	1	Oral Tongue	M0	N0	T2	Stage II	NO	Negative	G2	YES		YES
TCGA-CN-5359	377	1	YES	1	Floor of mouth	M0	N1	T4a	Stage IVA	NO	Negative	G2	YES	M0	YES
TCGA-CN-6017	853	1	YES	1	Oral Tongue	M0	N1	T2	Stage III	YES	Negative	G2	NO		YES
TCGA-CQ-A4C6	1353	0	YES	1	Buccal Mucosa	M0	N0	T2	Stage II	NO	Negative	G2	NO	M0	YES
TCGA-P3-A6T8	400	0	YES	1	Floor of mouth	M0	N0	T4a	Stage IVA	YES	Positive	G3	NO	MX	YES
TCGA-HD-8634	385	1	YES	1	Oral Tongue	M0	NX	T1	Stage I	NO	Negative	G2	NO	MX
TCGA-CQ-6218	1253	0	NO	1	Floor of mouth	M0	N0	T3	Stage III	NO	Negative	G2	NO		YES
TCGA-CV-7183	3981	0	NO	1	Oral Cavity	M0	N0	T2	Stage II		Negative	G1	NO
TCGA-D6-6823	701	0	YES	1	Oral Tongue	M0	N1	T3	Stage III		Close	G2	NO
TCGA-D6-8569	770	0	NO	1	Oral Tongue	M0	N0	T2	Stage II	NO	Negative	G2	NO	M0	NO
TCGA-CN-4741	2239	0	NO	1	Alveolar Ridge	M0	N0	T4a	Stage IVA	NO	Negative	G2	YES	M0	YES
TCGA-CV-A464	1722	0	YES	1	Buccal Mucosa	M0	N0	T4a	Stage IVA		Positive	G2	YES	M0	YES
TCGA-CV-A468	464	1	YES	1	Lip	M0	N2b	T3	Stage III		Negative	G2	NO	M0	YES
TCGA-F7-A50G	616	0	NO	1	Oral Tongue					NO	Close	G1	NO	M0	NO
TCGA-BA-A6DG	69	1	YES	1	Oral Tongue	M0	N2b	T4a	Stage IVA			G2	NO	MX
TCGA-CV-7254	1459	1	YES	1	Oral Cavity	M0	N0	T2	Stage II	YES	Positive	G3			NO
TCGA-CX-7086	573	0	YES	1	Floor of mouth	M0	N2c	T4a	Stage IVA	YES	Negative	G2	NO		NO
TCGA-HD-8635	695	0	YES	1	Oral Tongue	M0	N1	T1	Stage III	NO	Negative	G2	NO	MX	NO
TCGA-P3-A6T0	578	0	YES	1	Floor of mouth	M0	N2b	T4	Stage IVA		Negative	G2	YES	MX
TCGA-CN-5370	259	1	YES	1	Oral Tongue	M0	N0	T2	Stage II	NO	Negative	G3	YES	M0	YES
TCGA-DQ-5625	1133	1	YES	1	Oral Tongue	M0	N0	T2	Stage II	NO	Negative	G2	YES		NO
TCGA-CV-A6JN	906	0	YES	1	Oral Cavity	M0	N0	T2	Stage II		Negative	G1	NO
TCGA-BA-4075	283	1	YES	1	Oral Tongue	M0	N1	T4a	Stage IVA		Positive	G2	YES	M0
TCGA-BA-6872	384	1	YES	1	Floor of mouth	M0	N2c	T3	Stage IVA		Negative	G2
TCGA-CQ-6219	479	1	YES	1	Oral Tongue	M0	N2b	T3	Stage IVA	NO	Negative	G2	YES		YES
TCGA-CN-6994	1183	0		1	Oral Cavity	M0	N2b	T4a	Stage IVA	NO	Negative	G2	NO		YES
TCGA-CV-7428	1671	1	YES	1	Oral Cavity	M0	N2a	T4a	Stage IVA		Positive	G2
TCGA-QK-A6IG	222	1	YES	1	Buccal Mucosa	M0	N0	T2	Stage II	YES	Negative	G2	YES	M0	YES
TCGA-CQ-6224	1721	0	YES	1	Oral Tongue	M0	N0	T2	Stage II	NO	Negative	G3	NO		YES
TCGA-D6-A4Z9	539	0	NO	1	Oral Tongue	M0	N2	T2	Stage IVA	NO	Negative	G2	NO	M0	NO
TCGA-HD-A6I0	210	0	YES	1	Oral Cavity	M0	NX	T3	Stage III	NO	Negative	G1	NO	MX	YES
TCGA-QK-A8Z7	392	0	YES	1	Floor of mouth	M0	N2c	T4a	Stage IVA	NO	Close		NO	M0	NO
TCGA-BB-A6UO	268	1	NO	1	Oral Tongue	MX	N2	T3	Stage IVA	NO	Close	G2	YES	MX	YES
TCGA-DQ-5631	548	1	YES	1	Oral Tongue	M0	N2b	T3	Stage IVA	YES	Negative	G3	YES		NO
TCGA-CV-5976	1478	0	YES	1	Oral Tongue	M0	N1	T3	Stage III	NO	Negative	G2			YES
TCGA-CQ-A4C9	707	0	NO	1	Floor of mouth	MX	NX	TX		NO	Negative	G2	YES	M0	NO
TCGA-D6-A4ZB	376	0	NO	1	Oral Tongue	M0	N0	T3	Stage III	NO	Negative	G2	NO	M0	NO
TCGA-MT-A67D	56	0	YES	1	Floor of mouth	M0	N0	T2	Stage II	NO	Negative	G2	NO	M0	NO
TCGA-CN-6998	357	1	NO	1	Oral Tongue	M0	N1	T4a	Stage IVA	NO	Negative	G2	YES		NO
TCGA-CV-6441	292	1	YES	1	Oral Tongue	M0	N0	T3	Stage III	NO	Negative	G3	YES		YES
TCGA-CV-7095	572	1	NO	1	Oral Cavity	M0	N2a	T1	Stage IVA	NO	Negative	G2	NO		NO
TCGA-CV-7097	385	1	YES	1	Oral Cavity	M0	N0	T3	Stage III	NO	Close	G3			YES
TCGA-CV-A6JD	182	1	NO	1	Floor of mouth	M0	N0	T4a	Stage IVA		Negative	G3	NO
TCGA-CN-6011	933	0	YES	1	Alveolar Ridge	M0	N0	T4a	Stage IVA	NO		G3	NO		NO
TCGA-CV-6433	641	0	YES	1	Oral Tongue	M0	N0	T2	Stage II	NO	Negative	G3	NO		NO
TCGA-UF-A71B	1506	0	YES	1	Alveolar Ridge	M0	N1	T4a	Stage IVA	NO	Negative	G2	NO	M0	NO
TCGA-CV-6945	366	1	YES	1	Oral Tongue	M0	N2b	T4a	Stage IVA		Negative	G2			YES
TCGA-CV-6960	862	1	YES	1	Oral Cavity	M0	N0	T3	Stage III	NO	Negative	G3	NO		NO
TCGA-CR-7377	279	1	YES	1	Oral Cavity	M0	N1	T4a	Stage IVA	YES	Negative	G3	NO	M0	YES
TCGA-P3-A6T4	62	1	YES	1	Floor of mouth	M0	N1	T4	Stage IVA	YES	Positive	G2	NO	MX	YES
TCGA-BA-5556	725	0	YES	1	Floor of mouth	M0	N0	T2	Stage II	NO		G3	NO		NO
TCGA-CN-4728	1724	0	YES	1	Oral Cavity	M0	N2	T2	Stage IVA	YES	Negative	G2	NO		YES
TCGA-CQ-5330	1897	0	NO	1	Oral Tongue	M0	N1	T3	Stage III	NO	Negative	G3	NO		YES
TCGA-CQ-6222	2016	0	NO	1	Oral Tongue	M0	N2b	T3	Stage IVA	NO	Negative	G2	NO		NO
TCGA-CQ-7072	2359	0	YES	1	Floor of mouth	M0	N0	T4a	Stage IVA	NO	Negative	G3	NO	M0	YES
TCGA-CR-7368	1245	0	YES	1	Oral Cavity	M0	N0	T4a	Stage IVA		Negative	G2	NO	M0
TCGA-CR-7390	1508	0	YES	1	Oral Tongue	M0	N0	T3	Stage III		Negative	G2	NO	M0	YES
TCGA-DQ-7592	1143	0	YES	1	Oral Tongue	M0	N2b	T4a	Stage IVA	NO	Negative	G2	NO		YES
TCGA-CN-5367	352	1	YES	1	Oral Tongue	M0	N0	T4a	Stage IVA	YES	Negative	G2	NO	M0	YES
TCGA-CR-6471	1202	1	YES	1	Oral Cavity	M0	N0	T4a	Stage IVA	NO	Positive	G2	YES	M0	NO
TCGA-CV-6952	185	1	YES	1	Oral Tongue	M0	N0	T3	Stage III	NO	Negative	G1	NO		YES
TCGA-CR-6491	693	0	YES	1	Floor of mouth	M0	NX	T4a	Stage IVA	NO	Negative	G2	YES	M0	YES
TCGA-CN-5358	261	1	YES	1	Floor of mouth	M0	N1	T2	Stage III	NO	Negative	G2	YES		YES
TCGA-CV-5966	545	1	YES	1	Oral Cavity	M0	N1	T4a	Stage IVA	YES	Negative	G3	NO		YES
TCGA-DQ-7588	427	1	YES	1	Buccal Mucosa	M0	N1	T2	Stage III	NO	Negative	G3	YES		NO
TCGA-BA-7269	1273	0	YES	1	Oral Tongue	M0	N1	T2	Stage III	NO	Negative	G1	NO		YES
TCGA-CR-7365	1191	0	YES	1	Oral Cavity	M0	N2b	T4a	Stage IVA		Negative	G2	NO	M0	YES
TCGA-CV-5970	406	1	YES	1	Oral Tongue	M0	N2b	T4a	Stage IVA	NO	Negative	G2			YES
TCGA-T3-A92N	95	1	NO	1	Floor of mouth	M1	N1	T1	Stage IVC	NO	Positive	G3	YES	MX	YES
TCGA-CN-4730	817	0	YES	1	Floor of mouth	M0	N2b	T4a	Stage IVA	NO	Negative	G2	NO		NO
TCGA-CQ-5324	1593	0	NO	1	Floor of mouth	M0	N2a	T3	Stage IVA	NO	Negative	G2	NO		NO
TCGA-CQ-7063	2133	0	YES	1	Hard Palate					NO	Negative	G1	NO	M0	NO
TCGA-CQ-A4CA	0	0	YES	1	Oral Tongue	M0	N0	T2	Stage II	NO	Negative	G2	NO	M0	NO
TCGA-CR-7367	1440	0	YES	1	Oral Cavity	M0	N3	T4a	Stage IVB	NO	Negative	G1	NO	M0	YES
TCGA-CR-7401	1077	0	YES	1	Oral Tongue	M0	N0	T1	Stage I	NO	Negative	G2	NO	M0	NO
TCGA-HL-7533	1057	0	YES	1	Oral Cavity	M0	N2b	T2	Stage IVA			G3	NO
TCGA-IQ-7631	1172	0	NO	1	Buccal Mucosa	M0	N0	T2	Stage II	NO	Negative	G1	NO		NO
TCGA-QK-A6IJ	387	0	YES	1	Floor of mouth	M0	N0	T2	Stage II	NO	Negative	G3		M0	NO
TCGA-WA-A7H4	443	0		1	Oral Tongue	M0	N0	T2	Stage II		Negative	G3	NO
TCGA-UF-A7JS	680	1	YES	1	Oral Tongue	M0	N2b	T3	Stage IVA	YES	Positive	G2	YES	M0	YES
TCGA-BA-5151	722	0	YES	1	Buccal Mucosa	M0	N0	T4a	Stage IVA	NO	Close	G1	YES		NO
TCGA-CV-7568	927	1	NO	1	Oral Cavity	M0	N0	T4a	Stage IVA	YES	Negative	GX			YES
TCGA-CQ-A4CI	950	0	YES	1	Buccal Mucosa	MX	NX	TX		YES	Close	G3	NO	M0	NO
TCGA-IQ-7632	441	0	NO	1	Alveolar Ridge	M0	N0	T4a	Stage IVA		Negative	G1	NO	M0
TCGA-CN-6024	337	1	YES	1	Oral Tongue	M0	N2	T4a	Stage IVA	YES	Negative	G2	NO	M0	YES
TCGA-CQ-A4C7	353	1	YES	1	Floor of mouth	M0	N0	T2	Stage II	NO	Negative	G3	YES	M0	YES
TCGA-CR-7369	1090	1	YES	1	Oral Cavity	M0	N0	T4a	Stage IVA	NO	Negative	G2	NO	M0	YES
TCGA-CN-6016	1443	0	YES	1	Floor of mouth	M0	N1	T4a	Stage IVA	YES	Negative	G2	NO		YES
TCGA-CV-6436	1899	0	NO	1	Oral Tongue	M0	N0	T3	Stage III	NO	Negative	G1	NO		NO
TCGA-CV-A6JZ	714	0	YES	1	Oral Cavity	M0	N0	T4a	Stage IVA		Negative	G2	YES	M0
TCGA-F7-A50J	947	0	YES	1	Oral Tongue					YES	Close	G2	NO	M0	YES
TCGA-CQ-6227	129	1	YES	1	Oral Cavity	M0	N1	T3	Stage III	NO	Close	G2	NO		YES
TCGA-CQ-6228	456	1	YES	1	Floor of mouth	M0	N1	T2	Stage III	NO	Negative	G2	YES		NO
TCGA-CV-6941	342	1	YES	1	Oral Tongue	M0	N0	T3	Stage III	NO	Negative	G2	NO
TCGA-CV-6961	76	1	YES	1	Oral Tongue	M0	N0	T2	Stage II		Negative	G3	NO		NO
TCGA-CV-7100	274	1	NO	1	Oral Cavity	M0	N0	T2	Stage II	NO	Positive	G3			NO
TCGA-CV-7435	4680	1	NO	1	Oral Cavity	M0	N1	T4a	Stage IVA	YES	Negative	G2	NO		YES
TCGA-CV-A6JO	197	1	NO	1	Oral Tongue	M0	N2c	T4	Stage IVA		Negative	G2	YES	M0
TCGA-CR-7392	1425	0	NO	1	Oral Tongue	M0	N2b	T3	Stage IVA			G1	NO	M0	YES
TCGA-CV-7091	3381	0	YES	1	Oral Cavity	M0	N0	T1	Stage I	YES	Negative	G3
TCGA-D6-6516	773	0	NO	1	Lip	M0	N1	T1	Stage III	NO	Close	G2	NO
TCGA-CQ-5325	654	1	YES	1	Oral Tongue	M0	N0	T1	Stage I	NO	Negative	G2	YES		NO
TCGA-CV-7434	218	1	YES	1	Oral Cavity	M0	N0	T3	Stage III		Negative	G2	NO		YES
TCGA-CV-7446	1093	1	YES	1	Oral Tongue	M0	N0	T2	Stage II		Negative	G2			YES
TCGA-CQ-6223	1428	0	NO	1	Alveolar Ridge	M0	N0	T4a	Stage IVA	NO	Negative	G2	NO		NO
TCGA-CV-A6JU	110	0	YES	1	Oral Tongue	M0	N0	T4a	Stage IVA		Negative	G2	NO	M0
TCGA-DQ-5630	1030	0	YES	1	Oral Tongue	M0	N1	T3	Stage III	NO	Negative	G2	NO		YES
TCGA-CV-6954	2002	1	YES	1	Oral Tongue	M0	N1	T4a	Stage IVA	NO	Negative	G2	NO		NO
TCGA-CR-6492	479	0	YES	1	Hard Palate	M0	N1	T4a	Stage IVA		Negative	G3	NO	M0	YES
TCGA-D6-6825	491	0	YES	1	Oral Tongue	M0	N0	T3	Stage III		Negative	G2	NO
TCGA-CR-6493	282	1	YES	1	Oral Tongue	M0	N2b	T3	Stage IVA	NO	Negative	G2	YES		YES
TCGA-CR-7386	1430	0	YES	1	Oral Cavity	M0	N1	T4a	Stage IVA		Positive	G1	YES	M0
TCGA-H7-7774	407	0	YES	1	Oral Cavity	M0	N0	T3	Stage III	NO		G2	YES		NO
TCGA-CR-7373	889	0	NO	1	Oral Cavity	M0	N2b	T4a	Stage IVA		Negative	G2	NO	M0	NO
TCGA-CV-6936	166	1	YES	1	Floor of mouth	M0	N2b	T4a	Stage IVA	YES		G2	YES		YES
TCGA-CQ-5331	1399	0	NO	1	Hard Palate	M0	N0	T4a	Stage IVA	NO	Negative	G2	NO		NO
TCGA-CV-7235	2347	0	YES	1	Floor of mouth	M0	N0	T3	Stage III	YES	Positive	G3	NO		NO
TCGA-BA-4074	462	1	YES	1	Oral Tongue	M0	N2c	T3	Stage IVA		Positive	G3	YES	M0
TCGA-CV-5436	584	1	YES	1	Floor of mouth	M0	N2b	T3	Stage IVA	NO	Negative	G2	NO		YES
TCGA-UF-A7JD	739	1	YES	1	Buccal Mucosa	M0	N0	T4a	Stage IVA	YES	Positive	G3	NO	M0	YES
TCGA-CQ-5333	341	1	YES	1	Oral Tongue	M0	N0	T1	Stage I	NO	Negative	G3	YES		NO
TCGA-CV-A6K2	317	1	YES	1	Oral Cavity	M0	N0	T2	Stage II		Negative	G1	YES	M0
TCGA-CR-7394	1346	0	NO	1	Oral Tongue	M0	N2c	T3	Stage IVA		Negative	G2	NO	M0	YES
TCGA-CV-A6JE	1075	0	YES	1	Oral Cavity	M0	N0	T2	Stage II		Negative	G2	NO
TCGA-CV-6934	65	1	NO	1	Oral Tongue	M0	N2b	T3	Stage IVA		Negative	G2
TCGA-CR-7395	930	0	YES	1	Oral Cavity	M0	N0	T2	Stage II	NO	Negative	G2	NO	M0	NO
TCGA-CV-7102	56	1	YES	1	Floor of mouth	M0	N1	T3	Stage III	YES	Negative	G3			NO
TCGA-CV-A45Q	5152	1	NO	1	Oral Cavity	M0	N1	T4a	Stage IVC		Negative	G1	NO
TCGA-CQ-6221	1000	0	YES	1	Oral Tongue	M0	N0	T2	Stage II	NO	Negative	G3	NO		NO
TCGA-CR-7376	972	0	YES	1	Oral Cavity	M0	N0	T2	Stage II	YES	Positive	G2	NO	M0	NO
TCGA-CQ-5323	1466	0	YES	1	Alveolar Ridge	M0	N0	T3	Stage III	NO	Negative	G2	NO		NO
TCGA-CV-7427	4760	1	YES	1	Oral Cavity	M0	N0	T2	Stage II		Negative	G1	YES
TCGA-CV-7432	2570	1	NO	1	Oral Cavity	M0	N1	T2	Stage III		Negative	G1	NO		YES
TCGA-CV-7099	243	1	NO	1	Oral Cavity	M0	N0	T2	Stage II	NO	Negative	G2	NO		NO
TCGA-BA-A6DD	173	1	YES	0	Floor of mouth	M0	N2c	T4a	Stage IVA	NO	Positive	G2	YES	M0	YES
TCGA-BA-A6DJ	407	1	YES	0	Alveolar Ridge	M0	N2b	T4	Stage IVA	YES	Close	G2	YES	M0	YES
TCGA-C9-A47Z	191	1	NO	0	Oral Tongue	M0	N1	T2	Stage III			G1	NO	M0
TCGA-CN-4726	142	1	YES	0	Buccal Mucosa	M0	N2	T3	Stage IVA	YES	Positive	G2	YES		YES
TCGA-CN-4731	998	1	YES	0	Buccal Mucosa	M0	N2	T4a	Stage IVA	YES	Negative	G3	NO		YES
TCGA-CN-4740	839	1	YES	0	Oral Cavity	M0	N0	T4a	Stage IVA	NO	Negative	G2	NO	M0	NO
TCGA-CN-5364	493	1	YES	0	Floor of mouth	M0	N2c	T4a	Stage IVA	NO	Negative	G2	NO	M0	YES
TCGA-CN-5369	380	1	NO	0	Hard Palate	M0	N1	T4a	Stage IVA	NO	Negative	G3	NO	M0	YES
TCGA-CN-6013	727	1	YES	0	Alveolar Ridge	M0	N2b	T4a	Stage IVA	YES	Negative	G3	NO		NO
TCGA-CN-6018	580	1	NO	0	Oral Cavity	M0	N2c	T4a	Stage IVA	NO	Negative	G2	NO		YES
TCGA-CN-6020	205	1	YES	0	Oral Cavity	M0	N2c	T3	Stage IVA	YES	Negative	G2	NO		YES
TCGA-CN-6995	112	1	NO	0	Floor of mouth	M0	N1	T4a	Stage IVA	YES	Negative	G2	NO		NO
TCGA-CN-6996	530	1	NO	0	Oral Tongue	M0	N2b	T3	Stage IVA	YES	Negative	G2	YES		YES
TCGA-CN-A49A	526	1	YES	0	Alveolar Ridge	M0	N0	T4a	Stage IVA	NO	Negative	G2	NO	MX	NO
TCGA-CN-A642	82	1	YES	0	Floor of mouth	M0	N2c	T3	Stage IVA	YES	Positive	G3	NO	M0	YES
TCGA-CQ-5326	89	1	YES	0	Alveolar Ridge	M0	N2b	T4a	Stage IVA	NO	Negative	G3	NO		YES
TCGA-CQ-5332	317	1	YES	0	Floor of mouth	M0	N0	T3	Stage III	NO	Negative	G2			NO
TCGA-CQ-5334	129	1	NO	0	Buccal Mucosa	M0	N2b	T4b	Stage IVB	NO	Close	G2	YES		YES
TCGA-CQ-6220	985	1	YES	0	Buccal Mucosa	M0	N1	T2	Stage III	NO	Close	G2	NO		YES
TCGA-CQ-6225	403	1	NO	0	Oral Tongue	M0	N0	T2	Stage II	NO	Close	G2	YES		YES
TCGA-CQ-A4CG	430	1	YES	0	Buccal Mucosa	M0	N0	T2	Stage II	NO	Close	G2	NO	M0	YES
TCGA-CQ-A4CH	379	1	YES	0	Oral Tongue	M0	N2c	T4a	Stage IVA	NO	Negative	G2	NO	M0	YES
TCGA-CR-7380	606	1	YES	0	Oral Cavity	M0	N0	T3	Stage III	NO	Positive	G2	YES		YES
TCGA-CV-6933	2741	1	YES	0	Oral Tongue	M0	N0	T4a	Stage IVA		Negative	G2	NO		YES
TCGA-CV-6937	624	1	NO	0	Oral Cavity	M0	N0	T2	Stage II		Negative	G2
TCGA-CV-6938	144	1	NO	0	Oral Cavity	M0	N0	T2	Stage II		Negative	G1	NO
TCGA-CV-6939	666	1	NO	0	Oral Tongue	M0	N1	T4a	Stage IVA		Negative	G3
TCGA-CV-6948	1289	1	NO	0	Floor of mouth	M0	N0	T4a	Stage IVA		Negative	G2	NO
TCGA-CV-6951	915	1	YES	0	Oral Tongue	M0	N2c	T4a	Stage IVA	NO	Negative	G2			YES
TCGA-CV-6953	1641	1	NO	0	Floor of mouth	M0	N0	T3	Stage III	NO	Negative	G1	YES		YES
TCGA-CV-6955	334	1	NO	0	Oral Cavity	M0	N0	T2	Stage II			G3
TCGA-CV-6956	217	1	YES	0	Oral Tongue	M0	N2c	T4a	Stage IVA	YES	Negative	G2	NO		YES
TCGA-CV-6959	256	1	YES	0	Oral Tongue	M0	N1	T3	Stage III	NO	Negative	G2	YES		NO
TCGA-CV-7103	1591	1	YES	0	Oral Tongue	M0	N0	T2	Stage II		Negative	G2
TCGA-CV-7104	393	1	NO	0	Oral Tongue	M0	N2	T2	Stage IVA	YES	Negative	G2	NO		YES
TCGA-CV-7178	2166	1	YES	0	Oral Cavity	M0	N1	T4a	Stage IVA		Close	G3
TCGA-CV-7236	144	1	NO	0	Oral Tongue	M0	N2c	T2	Stage IVA	YES	Negative	G3			YES
TCGA-CV-7252	151	1	NO	0	Oral Cavity	M0	N0	T3	Stage III	NO	Positive	G2	NO		YES
TCGA-CV-7253	361	1		0	Oral Cavity	M0	N0	T2	Stage II	NO	Positive	G2	NO		NO
TCGA-CV-7255	64	1	YES	0	Oral Tongue	M0	N0	T2	Stage II	NO	Negative	G2	NO		YES
TCGA-CV-7263	560	1	NO	0	Oral Cavity	M0	NX	T2	Stage II	NO	Positive	G1			NO
TCGA-CV-7407	1081	1	NO	0	Floor of mouth	M0	N0	T2	Stage II		Negative	G2			YES
TCGA-CV-7409	543	1	NO	0	Oral Cavity	M0	N3	T4a	Stage IVB		Negative	G3
TCGA-CV-7411	2717	1	NO	0	Oral Cavity	M0	N0	T4a	Stage IVA		Negative	G1
TCGA-CV-7413	294	1	NO	0	Oral Cavity	M0	N0	T2	Stage II	NO	Negative	G2	NO		NO
TCGA-CV-7414	14	1	NO	0	Oral Cavity	M0	N1	T3	Stage III	YES	Negative	G2			YES
TCGA-CV-7416	763	1		0	Oral Cavity	M0	N0	T4a	Stage IVA		Negative	GX			NO
TCGA-CV-7423	3059	1	NO	0	Oral Cavity	M0	N0	T2	Stage II		Negative	G1
TCGA-CV-7425	1718	1	NO	0	Oral Cavity	M0	N0	T3	Stage III		Positive	G1
TCGA-CV-7429	107	1	YES	0	Oral Cavity	M0	N0	T3	Stage III		Negative	G3			YES
TCGA-CV-7438	194	1	NO	0	Oral Tongue	M0	N0	T2	Stage II	YES	Close	G3			YES
TCGA-CV-A45T	4856	1	YES	0	Oral Tongue	M0	N0	T2	Stage II		Positive	G3	NO	M0
TCGA-CV-A45U	1079	1	YES	0	Oral Cavity	M0	N0	T4	Stage IVA		Negative	G1	NO	M0
TCGA-CV-A45V	32	1	NO	0	Oral Cavity	M0	N0	T4	Stage IVA		Negative	G1	NO	M0
TCGA-CV-A45X	198	1	YES	0	Floor of mouth	M0	N1	T4a	Stage IVA		Negative	G2	NO	M0
TCGA-CV-A463	23	1	NO	0	Floor of mouth	M0	N0	T4a	Stage IVA		Negative	G2	NO	M0
TCGA-CV-A465	215	1	NO	0	Oral Tongue	M0	N0	T2	Stage II		Negative	G1	NO	M0
TCGA-CX-7082	11	1	YES	0	Oral Cavity	M0	N0	T2	Stage II	NO	Close	G2	NO		NO
TCGA-D6-6515	403	1	NO	0	Oral Tongue	M0	N0	T2	Stage II		Close	G3	YES
TCGA-HD-7917	836	1	YES	0	Floor of mouth	M0	N0	T2	Stage II	NO	Negative	G1			NO
TCGA-P3-A5QF	330	1	NO	0	Alveolar Ridge	M0	N2b	T4	Stage IVA	YES	Positive	G2	YES	MX	NO
TCGA-P3-A6T3	577	1	YES	0	Oral Cavity	M0	N1	T4	Stage IVA	NO	Positive	G2	YES	MX
TCGA-P3-A6T5	882	1	YES	0	Alveolar Ridge	M0	N0	T4	Stage IVA		Close	G2	YES	MX	YES
TCGA-P3-A6T6	395	1	YES	0	Alveolar Ridge	M0	N0	T4	Stage IVA	YES	Positive	G3	YES	MX	YES
TCGA-P3-A6T7	487	1	YES	0	Floor of mouth	M0	N1	T3	Stage III	YES	Close	G2		MX	YES
TCGA-QK-A64Z	641	1	YES	0	Hard Palate	M0	N0	T2	Stage II	NO	Close	G1	YES	MX	NO
TCGA-QK-A8Z9	449	1	YES	0	Floor of mouth	M0	N2b	T4a	Stage IVA	YES	Negative	G2	YES	M0	YES
TCGA-RS-A6TO	387	1	NO	0	Oral Cavity	M0	N2c	T4	Stage IVA	NO	Positive	G2	YES	M0	YES
TCGA-T2-A6WX	209	1	YES	0	Oral Tongue	M0	N0	T3	Stage III	YES	Negative	G1	NO		YES
TCGA-T2-A6WZ	484	1	YES	0	Oral Tongue	M0	N2b	T3	Stage IVA	NO	Negative	G2	YES		YES
TCGA-UF-A71A	86	1	NO	0	Floor of mouth	M0	N2a	T3	Stage IVA	YES	Positive	G1	NO	M0	NO
TCGA-UF-A71E	1504	1	YES	0	Floor of mouth	M0	N0	T4	Stage IVA	YES	Negative	G3	NO	M0	NO
TCGA-UF-A7JO	631	1	NO	0	Floor of mouth	M0	N0	T4a	Stage IVA	NO	Negative	G2	YES	M0	NO
TCGA-UF-A7JT	993	1	NO	0	Floor of mouth	M0	N0	T4a	Stage IVA	NO	Negative	G3	YES	M0	YES
TCGA-4P-AA8J	102	0	NO	0	Oral Tongue	M0	N2a	T4a	Stage IVA	YES	Negative	G2	NO	MX	YES
TCGA-BA-5152	1288	0	YES	0	Alveolar Ridge	M0	N0	T4a	Stage IVA	NO	Negative	G2	NO	M0	NO
TCGA-BA-5557	623	0	YES	0	Oral Tongue	M0	N2	T2	Stage IVA	NO	Negative	G2	NO		NO
TCGA-BA-5558	1995	0	YES	0	Hard Palate	M0	N1	T4a	Stage IVA	NO		G1	NO		NO
TCGA-BA-A6D8	850	0	YES	0	Floor of mouth	M0	N2c	T4a	Stage IVA	YES	Positive	G2	YES	M0	YES
TCGA-BA-A6DB	216	0	YES	0	Oral Tongue	M0	N0	T2	Stage II	NO	Negative	G1	YES	M0	NO
TCGA-BA-A6DE	440	0	YES	0	Oral Tongue	M0	N0	T3	Stage III	NO	Negative	G2	NO	M0	NO
TCGA-BB-4224	278	0	YES	0	Oral Tongue	M0	N0	T3	Stage III		Negative	G2	YES
TCGA-BB-7863	1025	0	YES	0	Oral Tongue	M0	N0	T3	Stage III	NO	Negative	G2	NO		NO
TCGA-BB-7872	1168	0	YES	0	Oral Tongue	M0	N2c	T2	Stage IVA		Positive	G3	NO		YES
TCGA-BB-8601	624	0	YES	0	Floor of mouth	M0	N0	T2	Stage II	NO	Negative	G2	YES	MX	YES
TCGA-BB-A5HU	782	0	YES	0	Oral Cavity	M0	N2b	T4	Stage IVA	NO	Negative	G2	NO	M0	YES
TCGA-BB-A5HZ	827	0	YES	0	Oral Cavity	M0	N1	T4	Stage IVA	NO	Negative	G2	YES	M0	NO
TCGA-C9-A480	386	0	NO	0	Oral Tongue	M0	N0	T3	Stage III			G1	NO	M0
TCGA-CN-4725	1157	0	NO	0	Oral Tongue	M0	N0	T2	Stage II	NO	Negative	G2	NO		YES
TCGA-CN-4729	392	0	YES	0	Oral Cavity	M0	N0	T4a	Stage IVA	YES	Negative	G2	NO		NO
TCGA-CN-4733	1586	0	NO	0	Oral Tongue	M0	N0	T1	Stage I	YES	Negative	G3	NO		YES
TCGA-CN-4734	1690	0	YES	0	Buccal Mucosa	M0	N0	T2	Stage II	YES	Negative	G2	NO		YES
TCGA-CN-4737	625	0	NO	0	Oral Tongue	M0	N0	T2	Stage II	YES	Negative	G2	NO		YES
TCGA-CN-5373	1584	0	YES	0	Floor of mouth	M0	N0	T2	Stage II	NO	Negative	G1	NO		YES
TCGA-CN-6019	1038	0	YES	0	Oral Tongue	M0	N0	T4a	Stage IVA	NO		G2	NO		YES
TCGA-CQ-5327	1660	0	NO	0	Oral Tongue	M0	N2c	T3	Stage IVA	NO	Negative	G2	NO		NO
TCGA-CQ-5329	2143	0	NO	0	Oral Tongue	M0	N1	T3	Stage III	NO	Negative	G2	NO		NO
TCGA-CQ-6229	1179	0	NO	0	Oral Tongue	M0	N1	T2	Stage III	NO	Close	G2	NO		YES
TCGA-CQ-7065	1628	0	NO	0	Oral Tongue	M0	N0	T2	Stage II	NO	Negative	G2	NO		NO
TCGA-CQ-7067	509	0	NO	0	Oral Tongue	M0	N0	T1	Stage I	NO	Negative	G3	NO		YES
TCGA-CQ-7068	1309	0	NO	0	Floor of mouth	M0	N0	T2	Stage II	NO	Negative	G2	YES		NO
TCGA-CQ-7069	1274	0	YES	0	Alveolar Ridge	M0	N0	T2	Stage II	NO	Negative	G2	NO	M0	NO
TCGA-CQ-7071	1311	0	YES	0	Oral Cavity	M0	N1	T4a	Stage IVA	NO	Close	G2	NO	M0	NO
TCGA-CQ-A4CD	1022	0	YES	0	Oral Cavity	M0	N0	T4b	Stage IVB	NO	Close	G3	NO	M0	NO
TCGA-CQ-A4CE	897	0	YES	0	Oral Tongue	M0	N0	T2	Stage II	NO	Close	G2	NO	M0	YES
TCGA-CR-6484	354	0	NO	0	Oral Cavity	M0	N0	T4a	Stage IVA	NO	Negative	G2	NO	M0	NO
TCGA-CR-6488	379	0	YES	0	Oral Tongue	M0	N0	T2	Stage II	NO	Negative	G2	NO		YES
TCGA-CR-7372	759	0	YES	0	Oral Tongue	M0	N0	T2	Stage II	NO	Negative	G1	NO	M0	NO
TCGA-CR-7379	1036	0	NO	0	Oral Cavity	M0	N2b	T4a	Stage IVA	NO	Negative	G2	NO	M0	YES
TCGA-CR-7382	796	0	YES	0	Oral Tongue	M0	N2c	T2	Stage IVA		Negative	G2	YES	M0
TCGA-CR-7393	993	0	YES	0	Oral Tongue	M0	N0	T1	Stage I	NO	Negative	G2	NO	M0	NO
TCGA-CV-5442	2327	0	NO	0	Hard Palate	M0	N2b	T4a	Stage IVA			G3	NO
TCGA-CV-5971	701	0	YES	0	Oral Tongue	M0	N2b	T2	Stage IVA	NO	Negative	G2			NO
TCGA-CV-5973	2641	0	NO	0	Oral Tongue	M0	N0	T3	Stage III	NO	Negative	G3	NO		YES
TCGA-CV-5977	1840	0	YES	0	Oral Tongue	M0	N1	T3	Stage III	YES	Negative	G2	NO		YES
TCGA-CV-5979	1315	0	YES	0	Oral Tongue	M0	N1	T3	Stage III	YES	Negative	G2	NO		YES
TCGA-CV-6003	1665	0	YES	0	Oral Tongue	M0	N0	T2	Stage II	NO	Negative	G2	NO		NO
TCGA-CV-6942	4282	0	NO	0	Oral Cavity	M0	N0	T2	Stage II		Negative	G3	NO		YES
TCGA-CV-7090	5252	0	NO	0	Oral Cavity	M0	N0	T2	Stage II		Negative	G2	NO		YES
TCGA-CV-7238	2727	0	NO	0	Oral Tongue	M0	N0	T2	Stage II	NO	Negative	G2	NO		YES
TCGA-CV-7243	954	0	YES	0	Oral Tongue	M0	N0	T2	Stage II	NO	Negative	G2			NO
TCGA-CV-A45O	851	0	NO	0	Alveolar Ridge	M0	N0	T3	Stage III		Negative	G2	NO
TCGA-CV-A45P	639	0	NO	0	Oral Tongue	M0	N0	T2	Stage II		Negative	G2	YES	M0
TCGA-CV-A45R	5480	0	YES	0	Oral Tongue	M0	N1	T3	Stage III		Negative	G1	NO	M0
TCGA-CV-A6JT	852	0	NO	0	Oral Tongue	M0	N0	T2	Stage II		Negative	G2	NO	M0
TCGA-CV-A6K0	606	0	YES	0	Oral Tongue	M0	N0	T2	Stage II		Negative	G3	YES	M0
TCGA-CX-7085	321	0	YES	0	Oral Tongue	M0	N0	T3	Stage III	NO	Close	G2	YES		YES
TCGA-CX-A4AQ	1555	0	YES	0	Floor of mouth	M0	N2a	T1	Stage IVA	YES	Positive	G3	NO	M0	NO
TCGA-D6-A6EM	232	0	NO	0	Oral Tongue	M0	N1	T2	Stage III	NO	Negative	G2	NO	M0	NO
TCGA-D6-A6EN	687	0	NO	0	Buccal Mucosa	M0	N0	T3	Stage III	YES	Negative	G3	NO	M0	NO
TCGA-D6-A6EO	759	0	NO	0	Floor of mouth	M0	N0	T4a	Stage IVA	NO	Negative	G2	NO	M0	NO
TCGA-DQ-5624	1778	0	NO	0	Oral Tongue	M0	N1	T4a	Stage IVA	NO	Negative	G2	NO		YES
TCGA-F7-A624	378	0	YES	0	Buccal Mucosa	MX	NX	TX		NO	Negative	G3	NO	M0	NO
TCGA-H7-8501	461	0	YES	0	Buccal Mucosa	M0	N2a	T4a	Stage IVA	YES	Negative	GX	NO	M0	YES
TCGA-HD-7831	667	0	YES	0	Oral Tongue	M0	N0	T3	Stage III	NO	Negative	G2	YES
TCGA-HD-7832	836	0	YES	0	Floor of mouth	M0	N2	T4a	Stage IVA	NO	Negative	G2	NO
TCGA-HD-A4C1	11	0	NO	0	Buccal Mucosa	M0	N2	T3	Stage IVA	NO	Close	G1	NO	MX	NO
TCGA-HD-A633	421	0	YES	0	Oral Cavity	M0	N0	T4	Stage IVA	NO	Negative	G2	YES	MX	NO
TCGA-HD-A6HZ	111	0	NO	0	Oral Tongue	M0	N0	T2	Stage II	YES	Close	G2	NO	MX	NO
TCGA-IQ-A61H	1138	0	NO	0	Oral Tongue	MX	N0	T2	Stage II	NO	Negative	G2	NO	MX	NO
TCGA-IQ-A61J	1021	0	NO	0	Oral Tongue	M0	N2b	T2	Stage IVA	NO	Negative	G1	NO	M0	YES
TCGA-IQ-A6SG	579	0		0	Oral Tongue	M0	N0	T3	Stage III		Negative	G2	NO	M0
TCGA-KU-A66T	552	0	NO	0	Floor of mouth	M0	N0	T4	Stage IVA	NO	Negative	G2	YES	MX	NO
TCGA-MT-A67A	914	0	YES	0	Oral Tongue	M0	N0	T1	Stage I	NO	Positive	G2	NO	MX	NO
TCGA-MT-A67F	384	0	YES	0	Oral Cavity	MX	N0	T4	Stage IVA	NO	Negative	G2	NO	MX	NO
TCGA-MT-A7BN	469	0	YES	0	Floor of mouth	M0	N2b	T2	Stage IVA	YES	Negative	G3	YES		NO
TCGA-P3-A5QA	2182	0	YES	0	Oral Tongue	M0	N0	T2	Stage II	NO	Negative	G3	NO	MX
TCGA-P3-A6T2	2298	0	YES	0	Buccal Mucosa	M0	N0	T2	Stage II		Positive	G2	NO	MX	YES
TCGA-QK-A652	645	0	YES	0	Oral Tongue	M0	N0	T2	Stage II	YES	Negative	G2	NO	MX	YES
TCGA-QK-A6IH	653	0	YES	0	Alveolar Ridge	M0	N1	T4a	Stage IVA	YES	Close	G2	YES	M0	YES
TCGA-QK-A6VB	641	0	NO	0	Floor of mouth	M0	N0	T4a	Stage IVA	NO	Negative	G2	YES	M0	NO
TCGA-QK-AA3K	253	0	YES	0	Oral Tongue	MX	N2b	T3	Stage IVA	NO	Positive	G2		MX	YES
TCGA-T2-A6X2	987	0	YES	0	Alveolar Ridge	M0	N0	T3	Stage III	NO	Negative	G1	NO	MX	YES
TCGA-UF-A719	1663	0	YES	0	Floor of mouth	M0	N0	T3	Stage III	NO	Negative	G1	NO	M0	NO
TCGA-UF-A7JA	2265	0	YES	0	Buccal Mucosa	M0	N1	T4a	Stage IVA	YES	Negative	G2	NO	M0	NO
TCGA-UP-A6WW	518	0	YES	0	Oral Tongue	MX	N2c	T2	Stage IVA	YES	Negative	G2	NO		YES
